# Supplementary material for: 2-(1-Pyrenyl) benzimidazole as a ratiometric and “turn-on” fluorescent probe for iron(iii) ions in aqueous solution
Source: Royal Society of Chemistry journal article supplement (doi:10.1039/c5an02565f), 2016-01-01
Supplement: c5an02565f1.pdf [file c5an02565f1.pdf]

## †Electronic supplementary information (ESI)

### 2-(1-Pyrenyl) benzimidazole as a ratiometric and “turn-on” fluorescent probe for iron(III) ions in aqueous solution

Meili Zhao<sup>a</sup>, Zhifu Deng<sup>a</sup>, Jian Tang<sup>a</sup>, Xiufen Zhou<sup>a</sup>, Zhi Chen<sup>a</sup>, Xutian Li<sup>a</sup>, Liting  
Yang<sup>a</sup>, Li-Jun Ma<sup>a, b,\*</sup>

<sup>a</sup>*School of Chemistry and Environment, South China Normal University, Shipai,  
Guangzhou, 510631, P. R. China. Tel: +86-20-39310251; Fax: +86-20-39310187;*

<sup>b</sup>*Guangzhou Key Laboratory of Materials for Energy Conversion and Storage;*

|                                                                                                           |               |
|-----------------------------------------------------------------------------------------------------------|---------------|
| Table of.....                                                                                             | contentsPages |
| Fig. S1 <sup>1</sup> H NMR and HRESIMS spectrum of <b>L</b> .....                                         | S2            |
| Fig. S2 UV-Vis absorption spectra of <b>L</b> with Fe <sup>3+</sup> in buffer aqueous solution.....       | S3            |
| Fig. S3 Job's plot and the binding constant of <b>L</b> to Fe <sup>3+</sup> in buffer aqueous solution... | S4            |
| Fig. S4 Interference experiments of <b>L</b> to Fe <sup>3+</sup> .....                                    | S5            |
| Fig. S5 The reversibility of <b>L</b> to Fe <sup>3+</sup> .....                                           | S6            |
| Fig. S6 The pH dependence of <b>L</b> to<br>Fe <sup>3+</sup> .....                                        | S7            |

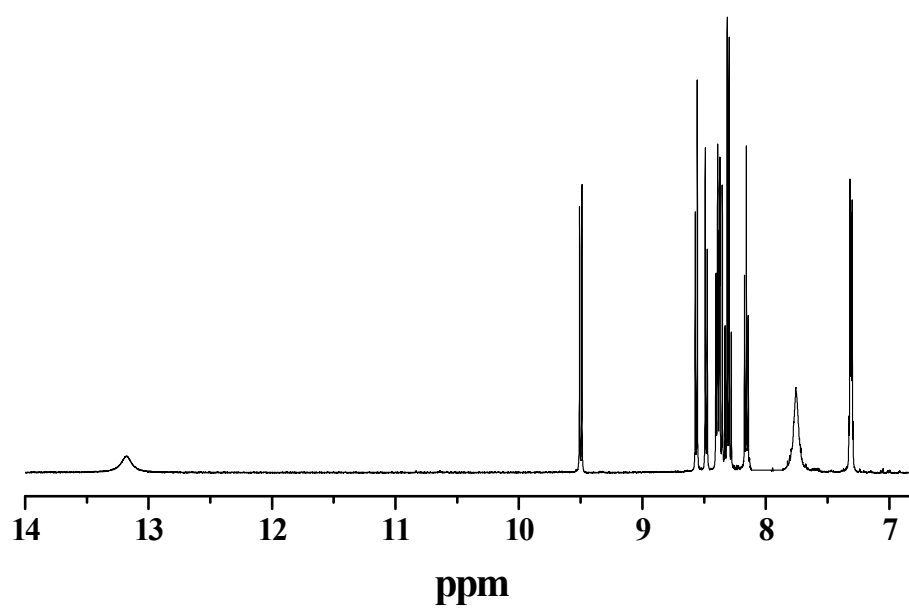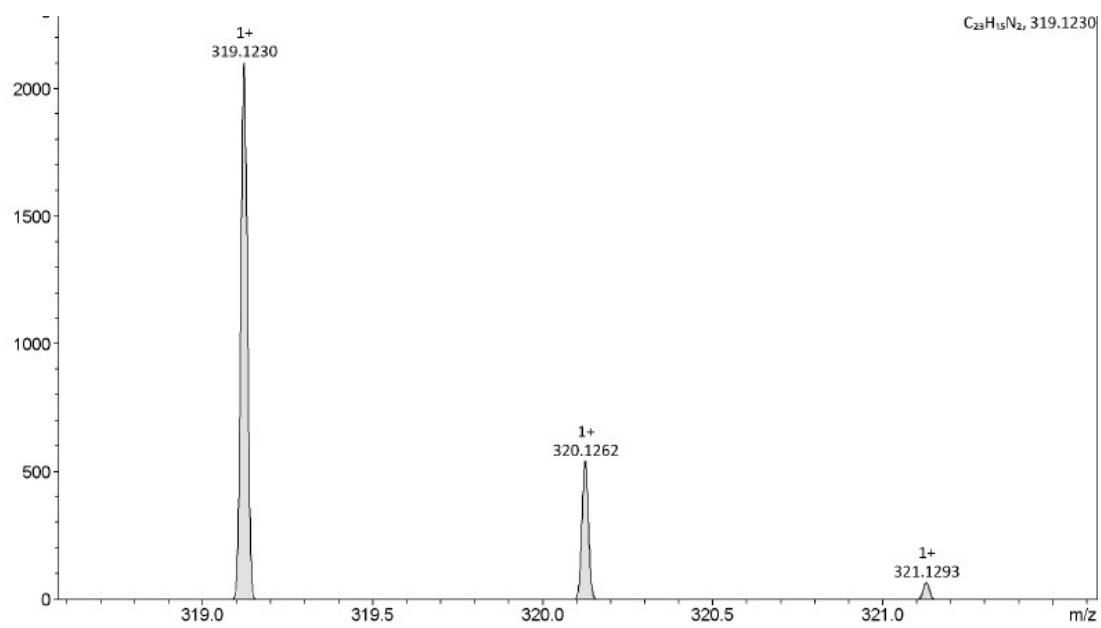

Fig.S1  $^1\text{H}$  NMR and HRESIMS spectrum of L.

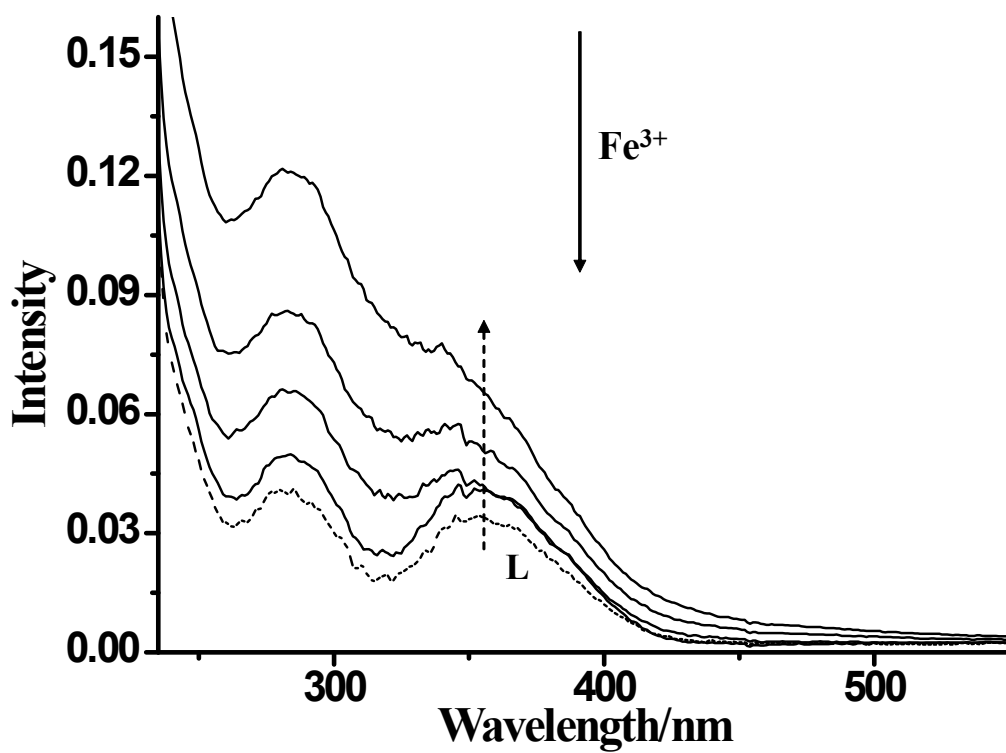

Fig. S2 UV-Vis absorption spectra of L with Fe<sup>3+</sup> in buffer aqueous solution.

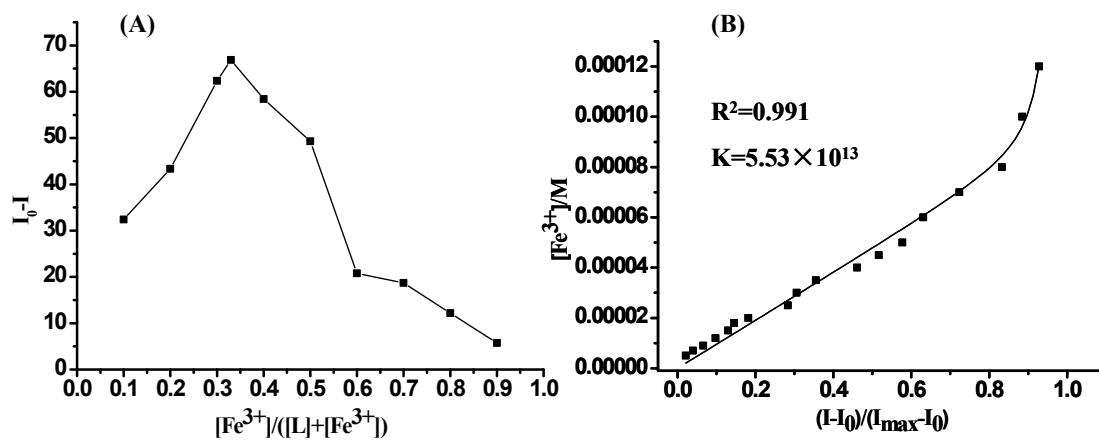

Fig. S3 Job's plot and the binding constant of L to Fe<sup>3+</sup> in buffer aqueous solution.

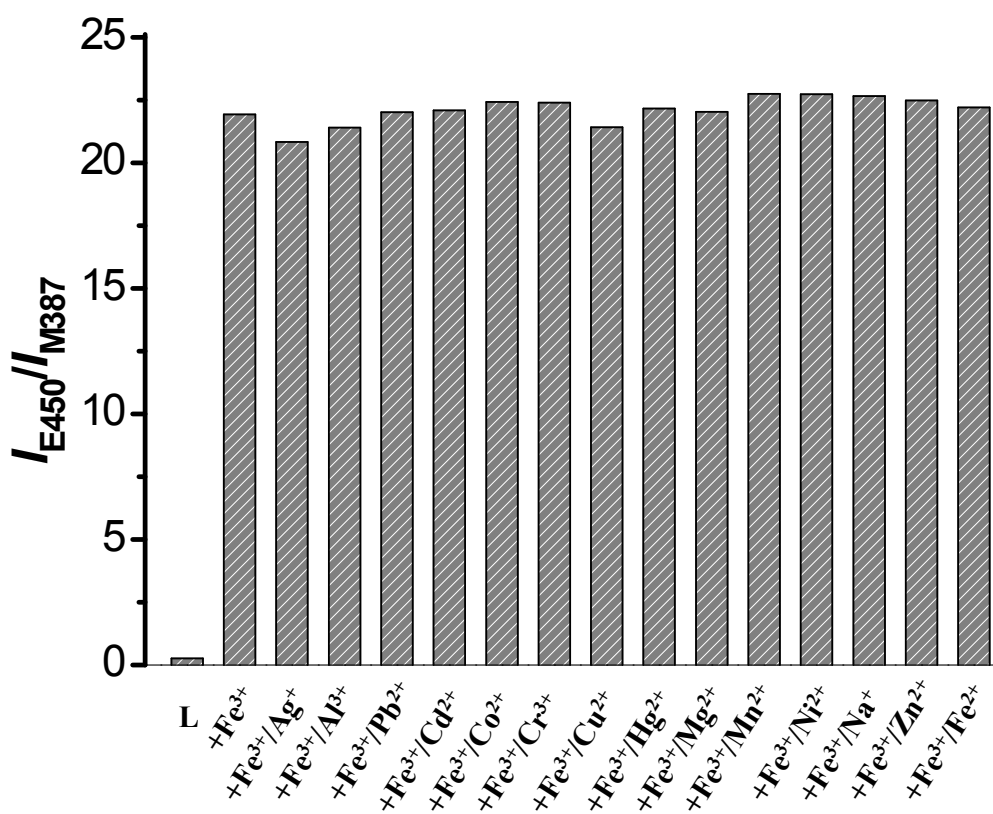

Fig. S4 Interference experiments of L to Fe<sup>3+</sup> in buffer aqueous solution.

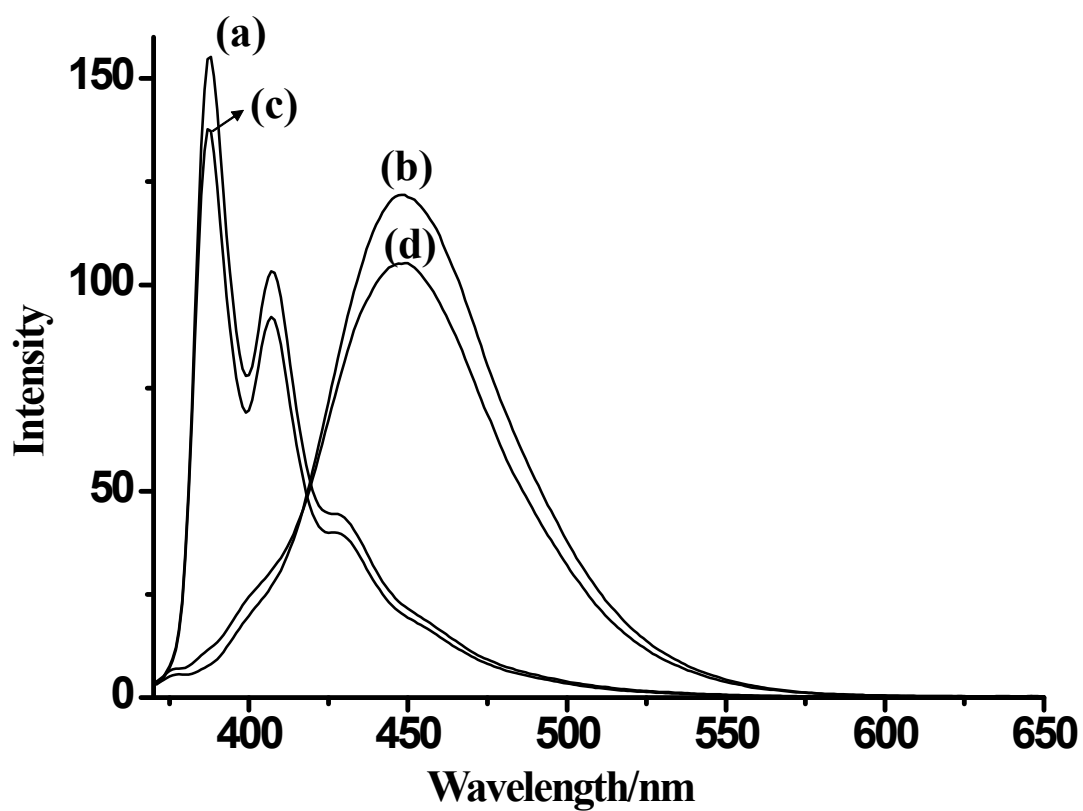

Fig. S5 The reversibility of L to Fe<sup>3+</sup>.

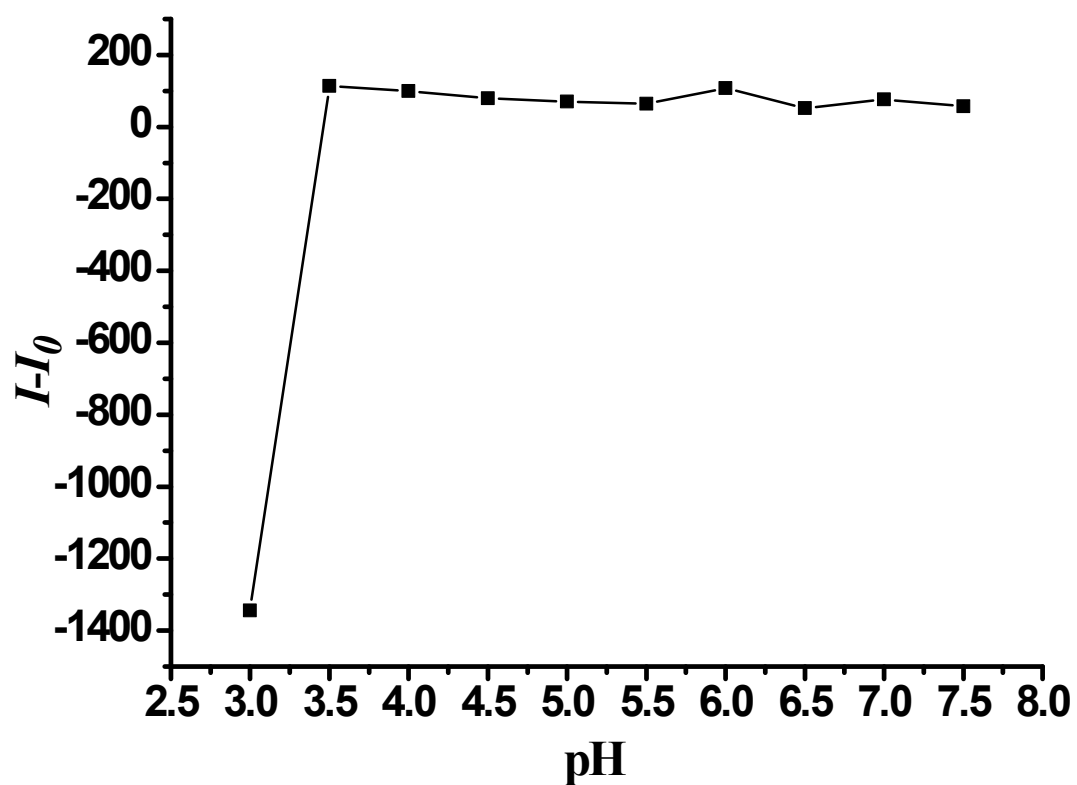

Fig. S6 Variation of fluorescent intensity ( $I-I_0$ ) at 450 nm of **L** in the presence and absence of  $\text{Fe}^{3+}$  (50.0  $\mu\text{M}$ ) as a function of pH values in buffer aqueous solution.
